# Supplementary material for: Transcriptomic dissection reveals wide spread differential expression in chickpea during early time points of Fusarium oxysporum f. sp. ciceri Race 1 attack
Source: PLoS One. 2017 May 25;12(5):e0178164. doi: 10.1371/journal.pone.0178164 (PMC5460890; doi:10.1371/journal.pone.0178164)
Supplement: S10 Table — Table includes list of primer pairs sequences used for qRT-PCR for representative transcripts with their respective abbreviations. (XLSX) [file pone.0178164.s016.xlsx]

## Sheet: Sheet1
S10 Table. List of Primers used for qRT-PCR analyses
Transcript name	abbreviation	Anealing temp	product length	forward primer	reverse primer
Pathogenesis Related protein	PR	54.4	154	GTTCCCACAGACAAGCCAGT	CAGTAGAGGCGGTTTCTTGC
(Iso)flavonoid glycosyltransferase	Ifg	54.4	277	CGATGACTGGCCCGAAGAAG	CACAACGCTTTGACTCGGTT
Heat shock protein	Hsp	54.4	153	ATGGTGCTCGACCTCTCTCT	CACTGTCGGGATGGTTGGAA
Mitogen-activated protein kinase 2	MPK	54.4	150	GCGAACAGTCTGTCGGAATC	GAGCACCCTTACCTCCACAT
Thaumatin-like protein PR-5b (Fragment)	pr5b	54.4	219	GAGGGCTCAAGGTGGTTGTA	AGGAGCACCAAGAGGACAGA
V-H(+)-ATPase subunit A	VH ATPase	53.6	240	AGAGTTTGGGTGTGAGTCCAT	TGACTCTGGCAACCATCACC
Senescense associated protein	sap	53.4	157	ACCCGCACGTATAGATGGAC	ACCGTTTCGCACAGCTAAGT
Cytochrome P450 monooxygenase	Ctrm	53.3	239	TCATCTCAAACGTCCCCTCC	TGCGCCAATGTTCACTGTAG
Acidic endochitinase	Ascend	53.3	184	GGCCATTGTGATCCATCCAC	GACGTGCCACCCAAGAAATT
Elongation factor 1-alpha (EF-1-alpha)	EF1	53.3	165	ACCACTGAAGTCAAGTCCGT	GAAAGAAGCGGCACCCATAG
Peptide transporter PTR5	PTR5	53.3	242	ATTGACATGTTGGCTGGTGA	GCTGCAATTGTGACAGAGGA
ATPase alpha/beta chain	Atps	52.3	152	TGACTTGCTTGCACCATACC	GGGTTCTTTCTCCAACACCA
Early nodulin	Enod	51.3	162	TCCACAGGTTGCAATCACAT	AGCACCATCCCAATTCACTC
WRKY transcription factor	WR	51.3	170	TACGAATCTGCATGGGTGAA	TACCAACCACCTGCGTTACA
Sieve element occlusion c	seo	52.3	229	CTGATTCGCCTTTTCGAGAC	CACCCCTTGATCTTGCATCT
Phosphoenolpyruvate carboxylase	pec	53.3	189	GGACCTCCTCCTCTTCCAAC	AAACCGCATTGATGGTAAGC
Histidinol dehydrogenase	hdh	51.3	184	GCTTACCATCAATGCGGTTT	ATCTCGATGGCAACATCTCC
